# Supplementary material for: The importance of censoring in competing risks analysis of the subdistribution hazard
Source: PubMed Central journal article supplement (PMC5379776; doi:10.1186/s12874-017-0327-3), 2017-04-04
Supplement: 12874_2017_327_MOESM3_ESM.pdf [file 12874_2017_327_MOESM3_ESM.pdf]

Additional file 3 for  
“The importance of censoring in competing risks analysis of the subdistribution  
hazard”

Mark W Donoghoe and Val Gebski

### Results from simulation study

The following tables present the full results from the simulation study described in the main paper. The algorithm used to generate the simulated datasets is described in Additional file 1. In each case, the approximate rate of censoring due to end-of-study was fixed at 10% and the approximate rate of young subjects who were censored due to loss to follow-up was 10%.

Each table shows a different hazard ratio for censoring due to loss to follow-up between old and young subjects, varying between 1.00 and 2.72. Within each table, the true subdistribution hazard ratio for exposure was varied between 1.00 and 2.72, and the risk of the competing event in the reference exposure group ( $q_0$ ) was varied between 0% and 30%.

The empirical bias is the observed average bias across the 1000 simulations, and the SD is the sample standard deviation of the 1000 estimates. The standard error of the estimated bias is  $SD/\sqrt{1000}$ . MSE was calculated as  $\text{Bias}^2 + \text{SD}^2$ , and is presented relative to Model 1. Note that when  $q_0 = 0$ , so there are no competing events, all four models are identical.

| Censoring HR = 1.00 (no difference) |              |        |       |         |        |       |         |        |       |         |
|-------------------------------------|--------------|--------|-------|---------|--------|-------|---------|--------|-------|---------|
| Exposure<br>$q_0$                   | SHR<br>Model | 1.00   |       |         | 1.65   |       |         | 2.72   |       |         |
|                                     |              | Bias   | SD    | Rel MSE | Bias   | SD    | Rel MSE | Bias   | SD    | Rel MSE |
| 0.00                                | Model 1      | 0.003  | 0.133 | 1.000   | 0.002  | 0.130 | 1.000   | 0.004  | 0.133 | 1.000   |
|                                     | Model 2      | 0.003  | 0.133 | 1.000   | 0.002  | 0.130 | 1.000   | 0.004  | 0.133 | 1.000   |
|                                     | Model 3      | 0.003  | 0.133 | 1.000   | 0.002  | 0.130 | 1.000   | 0.004  | 0.133 | 1.000   |
|                                     | Model 4      | 0.003  | 0.133 | 1.000   | 0.002  | 0.130 | 1.000   | 0.004  | 0.133 | 1.000   |
| 0.05                                | Model 1      | -0.001 | 0.133 | 1.000   | 0.005  | 0.127 | 1.000   | 0.006  | 0.140 | 1.000   |
|                                     | Model 2      | -0.001 | 0.134 | 1.004   | 0.005  | 0.127 | 1.000   | 0.006  | 0.141 | 1.002   |
|                                     | Model 3      | -0.002 | 0.135 | 1.022   | 0.007  | 0.126 | 1.000   | 0.007  | 0.141 | 1.006   |
|                                     | Model 4      | -0.002 | 0.136 | 1.038   | 0.008  | 0.127 | 1.002   | 0.007  | 0.141 | 1.008   |
| 0.10                                | Model 1      | 0.004  | 0.135 | 1.000   | 0.009  | 0.132 | 1.000   | -0.002 | 0.137 | 1.000   |
|                                     | Model 2      | 0.005  | 0.135 | 1.006   | 0.009  | 0.132 | 0.996   | -0.002 | 0.137 | 1.001   |
|                                     | Model 3      | 0.004  | 0.137 | 1.029   | 0.011  | 0.134 | 1.022   | -0.000 | 0.137 | 1.002   |
|                                     | Model 4      | 0.003  | 0.138 | 1.051   | 0.012  | 0.134 | 1.030   | 0.000  | 0.138 | 1.004   |
| 0.15                                | Model 1      | -0.006 | 0.135 | 1.000   | -0.001 | 0.132 | 1.000   | 0.002  | 0.146 | 1.000   |
|                                     | Model 2      | -0.006 | 0.135 | 1.002   | -0.001 | 0.132 | 1.002   | 0.002  | 0.146 | 1.001   |
|                                     | Model 3      | -0.007 | 0.135 | 1.005   | -0.001 | 0.134 | 1.031   | 0.006  | 0.147 | 1.013   |
|                                     | Model 4      | -0.008 | 0.137 | 1.034   | 0.000  | 0.135 | 1.053   | 0.007  | 0.147 | 1.021   |
| 0.20                                | Model 1      | 0.000  | 0.140 | 1.000   | 0.003  | 0.138 | 1.000   | 0.009  | 0.137 | 1.000   |
|                                     | Model 2      | 0.001  | 0.140 | 1.001   | 0.004  | 0.138 | 1.004   | 0.009  | 0.137 | 1.004   |
|                                     | Model 3      | -0.001 | 0.141 | 1.026   | 0.004  | 0.140 | 1.029   | 0.013  | 0.139 | 1.041   |
|                                     | Model 4      | -0.002 | 0.142 | 1.038   | 0.005  | 0.141 | 1.048   | 0.015  | 0.140 | 1.057   |
| 0.25                                | Model 1      | -0.001 | 0.145 | 1.000   | 0.003  | 0.144 | 1.000   | 0.009  | 0.142 | 1.000   |
|                                     | Model 2      | -0.000 | 0.145 | 1.000   | 0.004  | 0.145 | 1.005   | 0.009  | 0.142 | 1.003   |
|                                     | Model 3      | -0.003 | 0.147 | 1.021   | 0.004  | 0.146 | 1.029   | 0.013  | 0.144 | 1.024   |
|                                     | Model 4      | -0.003 | 0.147 | 1.035   | 0.005  | 0.148 | 1.048   | 0.016  | 0.144 | 1.041   |
| 0.30                                | Model 1      | 0.009  | 0.150 | 1.000   | 0.003  | 0.144 | 1.000   | -0.005 | 0.144 | 1.000   |
|                                     | Model 2      | 0.010  | 0.150 | 1.001   | 0.004  | 0.144 | 1.004   | -0.004 | 0.144 | 1.001   |
|                                     | Model 3      | 0.009  | 0.151 | 1.011   | 0.004  | 0.145 | 1.026   | -0.000 | 0.146 | 1.026   |
|                                     | Model 4      | 0.008  | 0.153 | 1.031   | 0.005  | 0.148 | 1.056   | 0.002  | 0.147 | 1.047   |

Table 1: Empirical bias, standard deviation and relative MSE of the estimators of the exposure subdistribution hazard ratio (SHR) from four different models, based on 1000 simulations for each scenario. The true exposure SHR and approximate proportion of subjects in the reference group experiencing the competing event ( $q_0$ ) were varied, and the hazard of censoring from loss to follow-up between age groups was fixed at 1.00 (old versus young).

| Censoring HR = 1.28 |              |        |       |         |        |       |         |        |       |         |
|---------------------|--------------|--------|-------|---------|--------|-------|---------|--------|-------|---------|
| Exposure<br>$q_0$   | SHR<br>Model | 1.00   |       |         | 1.65   |       |         | 2.72   |       |         |
|                     |              | Bias   | SD    | Rel MSE | Bias   | SD    | Rel MSE | Bias   | SD    | Rel MSE |
| 0.00                | Model 1      | 0.003  | 0.130 | 1.000   | 0.001  | 0.131 | 1.000   | 0.010  | 0.136 | 1.000   |
|                     | Model 2      | 0.003  | 0.130 | 1.000   | 0.001  | 0.131 | 1.000   | 0.010  | 0.136 | 1.000   |
|                     | Model 3      | 0.003  | 0.130 | 1.000   | 0.001  | 0.131 | 1.000   | 0.010  | 0.136 | 1.000   |
|                     | Model 4      | 0.003  | 0.130 | 1.000   | 0.001  | 0.131 | 1.000   | 0.010  | 0.136 | 1.000   |
| 0.05                | Model 1      | 0.000  | 0.138 | 1.000   | 0.001  | 0.129 | 1.000   | 0.009  | 0.136 | 1.000   |
|                     | Model 2      | 0.001  | 0.138 | 1.002   | 0.002  | 0.129 | 1.002   | 0.009  | 0.136 | 1.000   |
|                     | Model 3      | -0.001 | 0.141 | 1.040   | 0.003  | 0.130 | 1.023   | 0.010  | 0.136 | 1.004   |
|                     | Model 4      | -0.001 | 0.142 | 1.052   | 0.004  | 0.131 | 1.036   | 0.010  | 0.136 | 1.007   |
| 0.10                | Model 1      | -0.002 | 0.130 | 1.000   | -0.003 | 0.135 | 1.000   | 0.011  | 0.136 | 1.000   |
|                     | Model 2      | -0.001 | 0.131 | 1.002   | -0.002 | 0.135 | 1.000   | 0.011  | 0.136 | 1.002   |
|                     | Model 3      | -0.002 | 0.133 | 1.038   | -0.001 | 0.137 | 1.030   | 0.013  | 0.136 | 1.006   |
|                     | Model 4      | -0.002 | 0.135 | 1.064   | 0.001  | 0.137 | 1.043   | 0.013  | 0.136 | 1.007   |
| 0.15                | Model 1      | -0.002 | 0.139 | 1.000   | -0.001 | 0.137 | 1.000   | 0.003  | 0.142 | 1.000   |
|                     | Model 2      | 0.000  | 0.140 | 1.002   | 0.000  | 0.137 | 1.001   | 0.004  | 0.142 | 1.002   |
|                     | Model 3      | -0.002 | 0.139 | 0.997   | 0.001  | 0.138 | 1.014   | 0.007  | 0.143 | 1.013   |
|                     | Model 4      | -0.002 | 0.141 | 1.021   | 0.003  | 0.139 | 1.032   | 0.008  | 0.143 | 1.020   |
| 0.20                | Model 1      | 0.003  | 0.142 | 1.000   | -0.000 | 0.138 | 1.000   | 0.016  | 0.142 | 1.000   |
|                     | Model 2      | 0.005  | 0.142 | 1.005   | 0.001  | 0.138 | 1.004   | 0.017  | 0.142 | 1.003   |
|                     | Model 3      | 0.003  | 0.143 | 1.026   | 0.003  | 0.141 | 1.043   | 0.020  | 0.144 | 1.030   |
|                     | Model 4      | 0.002  | 0.145 | 1.044   | 0.003  | 0.142 | 1.062   | 0.023  | 0.144 | 1.044   |
| 0.25                | Model 1      | -0.001 | 0.151 | 1.000   | 0.007  | 0.137 | 1.000   | 0.002  | 0.140 | 1.000   |
|                     | Model 2      | 0.002  | 0.152 | 1.003   | 0.009  | 0.137 | 1.006   | 0.003  | 0.141 | 1.004   |
|                     | Model 3      | 0.001  | 0.152 | 1.011   | 0.010  | 0.139 | 1.034   | 0.007  | 0.143 | 1.033   |
|                     | Model 4      | -0.001 | 0.154 | 1.032   | 0.011  | 0.140 | 1.057   | 0.011  | 0.144 | 1.053   |
| 0.30                | Model 1      | -0.003 | 0.157 | 1.000   | -0.002 | 0.146 | 1.000   | -0.002 | 0.146 | 1.000   |
|                     | Model 2      | -0.001 | 0.157 | 0.998   | -0.000 | 0.146 | 0.997   | -0.000 | 0.146 | 0.999   |
|                     | Model 3      | -0.002 | 0.157 | 1.006   | -0.001 | 0.148 | 1.036   | 0.003  | 0.147 | 1.013   |
|                     | Model 4      | -0.002 | 0.158 | 1.016   | 0.000  | 0.150 | 1.054   | 0.006  | 0.148 | 1.029   |

Table 2: Empirical bias, standard deviation and relative MSE of the estimators of the exposure subdistribution hazard ratio (SHR) from four different models, based on 1000 simulations for each scenario. The true exposure SHR and approximate proportion of subjects in the reference group experiencing the competing event ( $q_0$ ) were varied, and the hazard of censoring from loss to follow-up between age groups was fixed at 1.28 (old versus young).

| Censoring HR = 1.65 |         |        |       |         |        |       |         |       |       |         |
|---------------------|---------|--------|-------|---------|--------|-------|---------|-------|-------|---------|
| Exposure SHR        |         | 1.00   |       |         | 1.65   |       |         | 2.72  |       |         |
| $q_0$               | Model   | Bias   | SD    | Rel MSE | Bias   | SD    | Rel MSE | Bias  | SD    | Rel MSE |
| 0.00                | Model 1 | -0.002 | 0.133 | 1.000   | 0.002  | 0.132 | 1.000   | 0.001 | 0.138 | 1.000   |
|                     | Model 2 | -0.002 | 0.133 | 1.000   | 0.002  | 0.132 | 1.000   | 0.001 | 0.138 | 1.000   |
|                     | Model 3 | -0.002 | 0.133 | 1.000   | 0.002  | 0.132 | 1.000   | 0.001 | 0.138 | 1.000   |
|                     | Model 4 | -0.002 | 0.133 | 1.000   | 0.002  | 0.132 | 1.000   | 0.001 | 0.138 | 1.000   |
| 0.05                | Model 1 | -0.003 | 0.136 | 1.000   | 0.006  | 0.133 | 1.000   | 0.007 | 0.139 | 1.000   |
|                     | Model 2 | -0.001 | 0.136 | 1.004   | 0.006  | 0.134 | 1.002   | 0.007 | 0.139 | 1.003   |
|                     | Model 3 | -0.003 | 0.139 | 1.044   | 0.008  | 0.135 | 1.018   | 0.007 | 0.139 | 1.006   |
|                     | Model 4 | -0.002 | 0.140 | 1.059   | 0.008  | 0.135 | 1.023   | 0.007 | 0.139 | 1.007   |
| 0.10                | Model 1 | -0.005 | 0.135 | 1.000   | 0.004  | 0.130 | 1.000   | 0.005 | 0.138 | 1.000   |
|                     | Model 2 | -0.002 | 0.136 | 1.005   | 0.006  | 0.130 | 1.002   | 0.006 | 0.138 | 1.000   |
|                     | Model 3 | -0.003 | 0.137 | 1.015   | 0.006  | 0.132 | 1.033   | 0.007 | 0.138 | 1.001   |
|                     | Model 4 | -0.003 | 0.138 | 1.031   | 0.008  | 0.133 | 1.047   | 0.008 | 0.138 | 1.005   |
| 0.15                | Model 1 | 0.001  | 0.139 | 1.000   | 0.007  | 0.138 | 1.000   | 0.002 | 0.140 | 1.000   |
|                     | Model 2 | 0.004  | 0.139 | 1.004   | 0.009  | 0.139 | 1.012   | 0.003 | 0.140 | 1.004   |
|                     | Model 3 | 0.004  | 0.141 | 1.028   | 0.011  | 0.141 | 1.036   | 0.006 | 0.141 | 1.027   |
|                     | Model 4 | 0.004  | 0.143 | 1.048   | 0.013  | 0.142 | 1.055   | 0.008 | 0.142 | 1.034   |
| 0.20                | Model 1 | -0.002 | 0.143 | 1.000   | 0.004  | 0.146 | 1.000   | 0.003 | 0.141 | 1.000   |
|                     | Model 2 | 0.001  | 0.144 | 1.007   | 0.007  | 0.147 | 1.005   | 0.004 | 0.141 | 1.000   |
|                     | Model 3 | -0.002 | 0.144 | 1.016   | 0.009  | 0.148 | 1.023   | 0.007 | 0.142 | 1.019   |
|                     | Model 4 | -0.003 | 0.146 | 1.042   | 0.010  | 0.149 | 1.040   | 0.009 | 0.142 | 1.024   |
| 0.25                | Model 1 | -0.011 | 0.157 | 1.000   | -0.002 | 0.139 | 1.000   | 0.003 | 0.143 | 1.000   |
|                     | Model 2 | -0.006 | 0.158 | 1.003   | 0.001  | 0.139 | 1.006   | 0.005 | 0.143 | 1.000   |
|                     | Model 3 | -0.009 | 0.159 | 1.017   | 0.002  | 0.140 | 1.016   | 0.009 | 0.144 | 1.021   |
|                     | Model 4 | -0.010 | 0.161 | 1.049   | 0.003  | 0.142 | 1.043   | 0.011 | 0.145 | 1.034   |
| 0.30                | Model 1 | -0.007 | 0.159 | 1.000   | -0.003 | 0.149 | 1.000   | 0.006 | 0.148 | 1.000   |
|                     | Model 2 | -0.003 | 0.159 | 1.000   | 0.001  | 0.149 | 1.003   | 0.008 | 0.149 | 1.008   |
|                     | Model 3 | -0.004 | 0.160 | 1.010   | 0.000  | 0.149 | 1.012   | 0.011 | 0.150 | 1.029   |
|                     | Model 4 | -0.005 | 0.161 | 1.025   | 0.001  | 0.151 | 1.027   | 0.014 | 0.151 | 1.043   |

Table 3: Empirical bias, standard deviation and relative MSE of the estimators of the exposure subdistribution hazard ratio (SHR) from four different models, based on 1000 simulations for each scenario. The true exposure SHR and approximate proportion of subjects in the reference group experiencing the competing event ( $q_0$ ) were varied, and the hazard of censoring from loss to follow-up between age groups was fixed at 1.65 (old versus young).

| Censoring HR = 2.12 |         |        |       |         |        |       |         |        |       |         |
|---------------------|---------|--------|-------|---------|--------|-------|---------|--------|-------|---------|
| Exposure SHR        |         | 1.00   |       |         | 1.65   |       |         | 2.72   |       |         |
| $q_0$               | Model   | Bias   | SD    | Rel MSE | Bias   | SD    | Rel MSE | Bias   | SD    | Rel MSE |
| 0.00                | Model 1 | 0.009  | 0.136 | 1.000   | 0.002  | 0.128 | 1.000   | -0.001 | 0.135 | 1.000   |
|                     | Model 2 | 0.009  | 0.136 | 1.000   | 0.002  | 0.128 | 1.000   | -0.001 | 0.135 | 1.000   |
|                     | Model 3 | 0.009  | 0.136 | 1.000   | 0.002  | 0.128 | 1.000   | -0.001 | 0.135 | 1.000   |
|                     | Model 4 | 0.009  | 0.136 | 1.000   | 0.002  | 0.128 | 1.000   | -0.001 | 0.135 | 1.000   |
| 0.05                | Model 1 | -0.009 | 0.134 | 1.000   | -0.004 | 0.131 | 1.000   | 0.004  | 0.138 | 1.000   |
|                     | Model 2 | -0.006 | 0.134 | 1.002   | -0.002 | 0.131 | 1.004   | 0.004  | 0.138 | 1.000   |
|                     | Model 3 | -0.008 | 0.136 | 1.023   | -0.001 | 0.132 | 1.014   | 0.005  | 0.138 | 1.002   |
|                     | Model 4 | -0.008 | 0.137 | 1.040   | -0.001 | 0.133 | 1.022   | 0.005  | 0.138 | 1.004   |
| 0.10                | Model 1 | -0.005 | 0.139 | 1.000   | 0.001  | 0.136 | 1.000   | 0.004  | 0.135 | 1.000   |
|                     | Model 2 | -0.000 | 0.139 | 1.000   | 0.003  | 0.136 | 0.996   | 0.005  | 0.135 | 0.998   |
|                     | Model 3 | -0.002 | 0.140 | 1.013   | 0.004  | 0.137 | 1.019   | 0.007  | 0.136 | 1.011   |
|                     | Model 4 | -0.002 | 0.141 | 1.030   | 0.005  | 0.137 | 1.025   | 0.007  | 0.136 | 1.011   |
| 0.15                | Model 1 | -0.003 | 0.137 | 1.000   | -0.006 | 0.135 | 1.000   | 0.005  | 0.142 | 1.000   |
|                     | Model 2 | 0.003  | 0.137 | 1.004   | -0.002 | 0.135 | 1.001   | 0.006  | 0.142 | 1.006   |
|                     | Model 3 | 0.001  | 0.138 | 1.012   | -0.001 | 0.137 | 1.026   | 0.009  | 0.142 | 1.006   |
|                     | Model 4 | 0.001  | 0.139 | 1.028   | 0.001  | 0.138 | 1.046   | 0.011  | 0.143 | 1.014   |
| 0.20                | Model 1 | -0.001 | 0.151 | 1.000   | -0.000 | 0.139 | 1.000   | -0.012 | 0.142 | 1.000   |
|                     | Model 2 | 0.005  | 0.151 | 1.008   | 0.004  | 0.140 | 1.007   | -0.010 | 0.142 | 0.996   |
|                     | Model 3 | 0.002  | 0.152 | 1.025   | 0.006  | 0.142 | 1.038   | -0.007 | 0.144 | 1.018   |
|                     | Model 4 | 0.002  | 0.154 | 1.040   | 0.007  | 0.143 | 1.056   | -0.005 | 0.145 | 1.029   |
| 0.25                | Model 1 | -0.002 | 0.147 | 1.000   | 0.004  | 0.140 | 1.000   | -0.002 | 0.142 | 1.000   |
|                     | Model 2 | 0.004  | 0.147 | 1.003   | 0.009  | 0.141 | 1.009   | 0.001  | 0.142 | 0.999   |
|                     | Model 3 | 0.003  | 0.148 | 1.021   | 0.010  | 0.141 | 1.020   | 0.005  | 0.143 | 1.011   |
|                     | Model 4 | 0.003  | 0.150 | 1.044   | 0.012  | 0.143 | 1.049   | 0.007  | 0.144 | 1.024   |
| 0.30                | Model 1 | -0.001 | 0.158 | 1.000   | -0.006 | 0.149 | 1.000   | 0.000  | 0.149 | 1.000   |
|                     | Model 2 | 0.006  | 0.158 | 1.012   | -0.001 | 0.150 | 1.002   | 0.004  | 0.149 | 1.003   |
|                     | Model 3 | 0.005  | 0.159 | 1.017   | -0.002 | 0.151 | 1.021   | 0.007  | 0.150 | 1.020   |
|                     | Model 4 | 0.004  | 0.160 | 1.034   | -0.001 | 0.153 | 1.041   | 0.010  | 0.151 | 1.036   |

Table 4: Empirical bias, standard deviation and relative MSE of the estimators of the exposure subdistribution hazard ratio (SHR) from four different models, based on 1000 simulations for each scenario. The true exposure SHR and approximate proportion of subjects in the reference group experiencing the competing event ( $q_0$ ) were varied, and the hazard of censoring from loss to follow-up between age groups was fixed at 2.12 (old versus young).

| Censoring HR = 2.72 |              |        |       |         |        |       |         |        |       |         |
|---------------------|--------------|--------|-------|---------|--------|-------|---------|--------|-------|---------|
| Exposure<br>$q_0$   | SHR<br>Model | 1.00   |       |         | 1.65   |       |         | 2.72   |       |         |
|                     |              | Bias   | SD    | Rel MSE | Bias   | SD    | Rel MSE | Bias   | SD    | Rel MSE |
| 0.00                | Model 1      | 0.002  | 0.134 | 1.000   | 0.001  | 0.135 | 1.000   | 0.004  | 0.136 | 1.000   |
|                     | Model 2      | 0.002  | 0.134 | 1.000   | 0.001  | 0.135 | 1.000   | 0.004  | 0.136 | 1.000   |
|                     | Model 3      | 0.002  | 0.134 | 1.000   | 0.001  | 0.135 | 1.000   | 0.004  | 0.136 | 1.000   |
|                     | Model 4      | 0.002  | 0.134 | 1.000   | 0.001  | 0.135 | 1.000   | 0.004  | 0.136 | 1.000   |
| 0.05                | Model 1      | -0.006 | 0.134 | 1.000   | -0.006 | 0.134 | 1.000   | 0.007  | 0.139 | 1.000   |
|                     | Model 2      | -0.002 | 0.134 | 1.001   | -0.004 | 0.135 | 1.005   | 0.007  | 0.139 | 1.000   |
|                     | Model 3      | -0.004 | 0.136 | 1.028   | -0.003 | 0.136 | 1.021   | 0.008  | 0.139 | 1.003   |
|                     | Model 4      | -0.004 | 0.136 | 1.037   | -0.003 | 0.136 | 1.029   | 0.008  | 0.139 | 1.004   |
| 0.10                | Model 1      | -0.006 | 0.139 | 1.000   | -0.009 | 0.137 | 1.000   | -0.000 | 0.145 | 1.000   |
|                     | Model 2      | -0.000 | 0.140 | 1.003   | -0.006 | 0.137 | 1.001   | 0.001  | 0.145 | 1.000   |
|                     | Model 3      | -0.002 | 0.141 | 1.018   | -0.003 | 0.138 | 1.015   | 0.002  | 0.145 | 0.998   |
|                     | Model 4      | -0.001 | 0.141 | 1.030   | -0.002 | 0.139 | 1.027   | 0.003  | 0.145 | 1.000   |
| 0.15                | Model 1      | -0.007 | 0.140 | 1.000   | 0.004  | 0.138 | 1.000   | -0.003 | 0.138 | 1.000   |
|                     | Model 2      | 0.000  | 0.140 | 1.005   | 0.010  | 0.138 | 1.014   | -0.001 | 0.138 | 0.997   |
|                     | Model 3      | -0.001 | 0.141 | 1.017   | 0.011  | 0.140 | 1.038   | 0.001  | 0.139 | 1.016   |
|                     | Model 4      | -0.001 | 0.142 | 1.027   | 0.012  | 0.142 | 1.070   | 0.002  | 0.139 | 1.018   |
| 0.20                | Model 1      | -0.011 | 0.144 | 1.000   | -0.003 | 0.132 | 1.000   | -0.006 | 0.147 | 1.000   |
|                     | Model 2      | -0.003 | 0.144 | 0.998   | 0.003  | 0.132 | 1.000   | -0.003 | 0.147 | 1.004   |
|                     | Model 3      | -0.005 | 0.145 | 1.012   | 0.004  | 0.133 | 1.014   | 0.001  | 0.148 | 1.020   |
|                     | Model 4      | -0.005 | 0.146 | 1.031   | 0.005  | 0.133 | 1.026   | 0.003  | 0.149 | 1.033   |
| 0.25                | Model 1      | -0.005 | 0.152 | 1.000   | 0.000  | 0.138 | 1.000   | -0.005 | 0.146 | 1.000   |
|                     | Model 2      | 0.004  | 0.153 | 1.006   | 0.008  | 0.138 | 1.009   | -0.000 | 0.146 | 0.996   |
|                     | Model 3      | 0.001  | 0.155 | 1.034   | 0.008  | 0.138 | 0.999   | 0.003  | 0.147 | 1.013   |
|                     | Model 4      | 0.001  | 0.156 | 1.048   | 0.010  | 0.139 | 1.021   | 0.006  | 0.148 | 1.019   |
| 0.30                | Model 1      | -0.006 | 0.159 | 1.000   | -0.004 | 0.152 | 1.000   | -0.008 | 0.148 | 1.000   |
|                     | Model 2      | 0.003  | 0.159 | 1.003   | 0.004  | 0.152 | 1.003   | -0.003 | 0.147 | 0.992   |
|                     | Model 3      | 0.002  | 0.159 | 1.000   | 0.003  | 0.152 | 1.003   | -0.000 | 0.149 | 1.017   |
|                     | Model 4      | 0.002  | 0.160 | 1.008   | 0.005  | 0.153 | 1.016   | 0.003  | 0.150 | 1.032   |

Table 5: Empirical bias, standard deviation and relative MSE of the estimators of the exposure subdistribution hazard ratio (SHR) from four different models, based on 1000 simulations for each scenario. The true exposure SHR and approximate proportion of subjects in the reference group experiencing the competing event ( $q_0$ ) were varied, and the hazard of censoring from loss to follow-up between age groups was fixed at 2.72 (old versus young).
