# Supplementary material for: The importance of censoring in competing risks analysis of the subdistribution hazard
Source: Springer Nature journal article supplement (doi:10.1186/s12874-017-0327-3), 2017-04-04
Supplement: MOESM1 [file 12196336]

Additional file 1 for  
“The importance of censoring in competing risks  
analysis of the subdistribution hazard”

Mark W Donoghoe and Val Gebski

**Simulating competing risks data under the proportional subdistribution hazards model**

Let  $T_i$  denote the time of the first event for subject  $i$ , and  $\delta_i$  the type of that first event (where  $\delta_i = 1$  denotes the event of interest and  $\delta_i = 2$  any competing risk, without loss of generality). Let  $p(\mathbf{x}_i) = \Pr(T_i < \infty, \delta_i = 1 \mid \mathbf{x}_i)$  be the probability of experiencing the event of interest for a subject with covariate vector  $\mathbf{x}_i$ , and  $p_0 = p(\mathbf{0})$  is this probability for an individual with the ‘reference’ covariate vector.  $p(\mathbf{x}_i) = 1$  for all  $\mathbf{x}_i$  implies that the event of interest will eventually occur for every subject.  $q(\mathbf{x}_i) = 1 - p(\mathbf{x}_i) = \Pr(T_i < \infty, \delta_i = 2 \mid \mathbf{x}_i)$  is the probability of experiencing the competing risk, and  $q_0 = 1 - p_0$ .

In a proportional subdistribution hazards model with parameter vector  $\beta$ ,  $\exp(\beta_p)$  is the subdistribution hazard ratio associated with a one-unit increase in the  $p$ th component of the covariate vector.

A proportional subdistribution hazards model can be obtained by defining the subdistribution for the event of interest as

$$\begin{aligned} F(t; \mathbf{x}_i) &= \Pr(T_i \leq t, \delta_i = 1 \mid \mathbf{x}_i) \\ &= 1 - [1 - p_0 \{1 - \exp(-t)\}]^{\exp(\beta \mathbf{x}_i)}. \end{aligned}$$

That we have the desired model can be verified by using the relation

$$F(t; \mathbf{x}_i) = 1 - \exp \left\{ - \int_0^t \gamma(s; \mathbf{x}_i) ds \right\}$$

to obtain

$$\begin{aligned} \gamma(t; \mathbf{x}_i) &= \frac{p_0 \exp(-t)}{1 - p_0(1 - \exp(-t))} \exp(\beta \mathbf{x}_i) \\ &= \gamma_0(t) \exp(\beta \mathbf{x}_i) \end{aligned}$$

To simulate the competing risks data, we first generate the event type  $\delta_i$  for each subject using a binomial random variable with the probability of the event of interest occurring as the first event:

$$\Pr(\delta_i = 1 \mid \mathbf{x}_i) = 1 - (1 - p_0)^{\exp(\beta \mathbf{x}_i)}$$

If the simulated  $\delta_i = 1$ , the distribution of event times is

$$\begin{aligned}\Pr(T_i \leq t \mid \delta_i = 1, \mathbf{x}_i) &= \frac{\Pr(T_i \leq t, \delta_i = 1 \mid \mathbf{x}_i)}{\Pr(\delta_i = 1 \mid \mathbf{x}_i)} \\ &= \frac{1 - [1 - p_0 \{1 - \exp(-t)\}]^{\exp(\beta \mathbf{x}_i)}}{1 - (1 - p_0)^{\exp(\beta \mathbf{x}_i)}},\end{aligned}$$

and we can use the inverse of this cumulative distribution function to simulate event times  $T_i$  from simulated uniform random variables  $U_i \sim U[0, 1]$  as

$$T_i = -\log \left( \frac{(1 - U_i [1 - (1 - p_0)^{\exp(\beta \mathbf{x}_i)}])^{\exp(-\beta \mathbf{x}_i)} - (1 - p_0)}{p_0} \right)$$

If  $\delta_i = 2$ , we can assign event times in any way we see fit, possibly including a relationship with some covariate vector  $\mathbf{z}_i$  (which may include components of  $\mathbf{x}_i$ ). In our simulation study, we simply used exponentially distributed event times for all individuals:

$$\Pr(T_i \leq t \mid \delta_i = 2) = 1 - \exp(-t)$$

Censoring times  $C_i$  are simulated independently of event times, but may be related to the covariates  $\mathbf{x}_i$  and/or  $\mathbf{z}_i$ . If end of follow-up is the only reason for censoring,  $C_i$  may be fixed at a certain time, or generated from a uniform distribution in the case of a clinical trial with a constant accrual rate.

For our simulations, we generated two potential censoring times for each individual:  $C_{i1}$  and  $C_{i2}$ .  $C_{i1}$  represented censoring due to end of study with constant accrual, and was drawn from a uniform distribution  $U[0, c_m]$ , with  $c_m$  chosen so that the desired proportion of subjects  $p_{C_1}$  would have a censoring time prior to their event time  $T_i$ , using:

$$p_{C_1} \approx \Pr(C_{i1} < T_i \mid x_i = 0) = \frac{1}{c_m} - e^{-c_m}.$$

In our simulations, we used  $p_{C_1} = 0.1$ , so  $c_m \approx 10$ .

$C_{i2}$  represented censoring due to loss to follow-up, drawn independently from an exponential distribution, depending on some covariate vector  $\boldsymbol{\eta}_i$  (in our case, age group):

$$\Pr(C_{i2} \leq c \mid \boldsymbol{\eta}_i) = 1 - \exp(-c \lambda_C \exp(\beta_C \boldsymbol{\eta}_i))$$

with  $\lambda_C$  chosen so that approximately  $p_{C_2} = 10\%$  of subjects with  $\eta_i = 0$  (young) would have  $C_{i2} < T_i$ :

$$p_{C_2} \approx \Pr(C_{i2} < T_i \mid x_i = 0, \eta_i = 0) = \frac{\lambda_C}{\lambda_C + 1},$$

that is  $\lambda_C = 1/9$ , and  $\beta_C$  varied across scenarios. Each individual's censoring time was taken as the first of either type, that is,  $C_i = \min(C_{i1}, C_{i2})$ .

Each subject's time-to-event  $Z_i$  is then the minimum of  $T_i$  and  $C_i$ , and we set  $\delta_i = 0$  if the subject is censored before experiencing an event (that is, if  $C_i < T_i$ ).
